# Supplementary material for: Personality, Attitudinal, and Demographic Predictors of Non-consensual Dissemination of Intimate Images
Source: PubMed Central journal article supplement — J Interpers Violence. 2021 Sep 10;37(21-22):NP19265–89. doi: 10.1177/08862605211043586 (PMC9554400; doi:10.1177/08862605211043586), 2021-09-10
Supplement: sj-pdf-1-jiv-10.1177_08862605211043586.pdf [file sj-pdf-1-jiv-10.1177_08862605211043586.pdf]

## **Aggrieved Entitlement Scale**

*Instructions:* Rate your agreement with each statement using a 5-point scale. You may skip any questions you do not want to answer.

1. It is my birthright to achieve greatness
2. Women and minorities actually have more rights
3. White men are the ones who are truly persecuted in today's culture.
4. Reverse sexism and reverse racism are real and valid problems that I or people I know often have to deal with.
5. Our government should prioritize helping real citizens first, instead of immigrants who offer nothing of value to our country.
6. If our culture wasn't so politically correct, I would have achieved great things.
7. Race and gender quotas in jobs and universities are taking jobs away from well-deserving white men.
8. I believe I have been cheated out of opportunities that have been given to undeserving minorities instead so the employer can appear to be politically correct.
9. I believe that the invasion of immigrants is a threat to our way of life
